# Supplementary material
Source: Royal Society of Chemistry journal article supplement (doi:10.1039/d6ta02168a)
Supplement: d6ta02168a1.pdf [file d6ta02168a1.pdf]

## Supporting Information

### Mo-doped spinel NiCo<sub>2</sub>O<sub>4</sub> as a bifunctional electrocatalyst for highly efficient nitrate reduction to ammonia and oxygen evolution

Esakkinaveen Dhanaraman, Gita B. Bhanuse, Sanath Kumar, Yen-Pei Fu\*

Department of Materials Science and Engineering, National Dong Hwa University, Shou-Feng, Hualien 97401, Taiwan.

Corresponding Author: [ypfu@gms.ndhu.edu.tw](mailto:ypfu@gms.ndhu.edu.tw)

#### Graphical Abstract

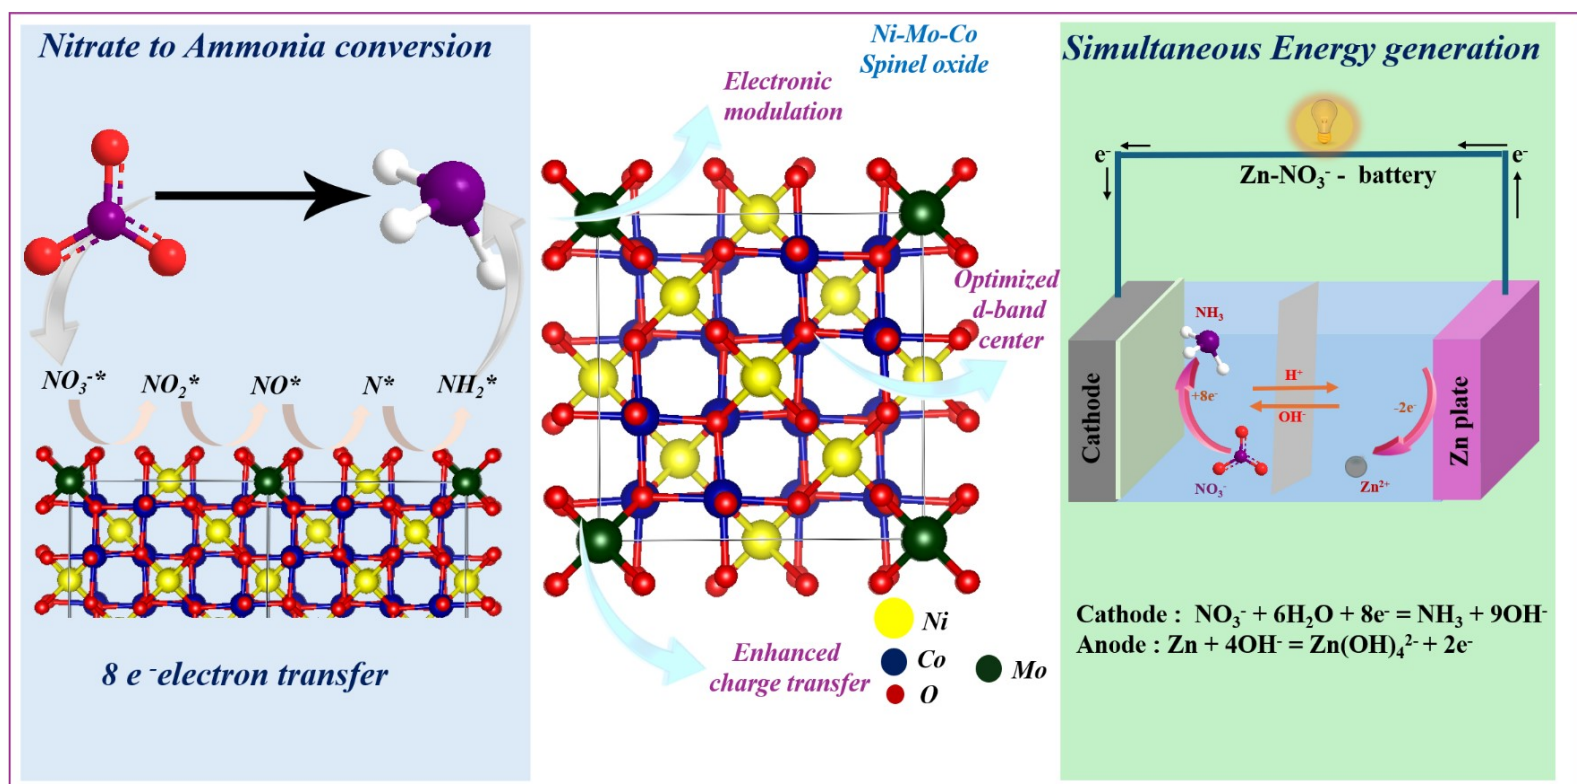

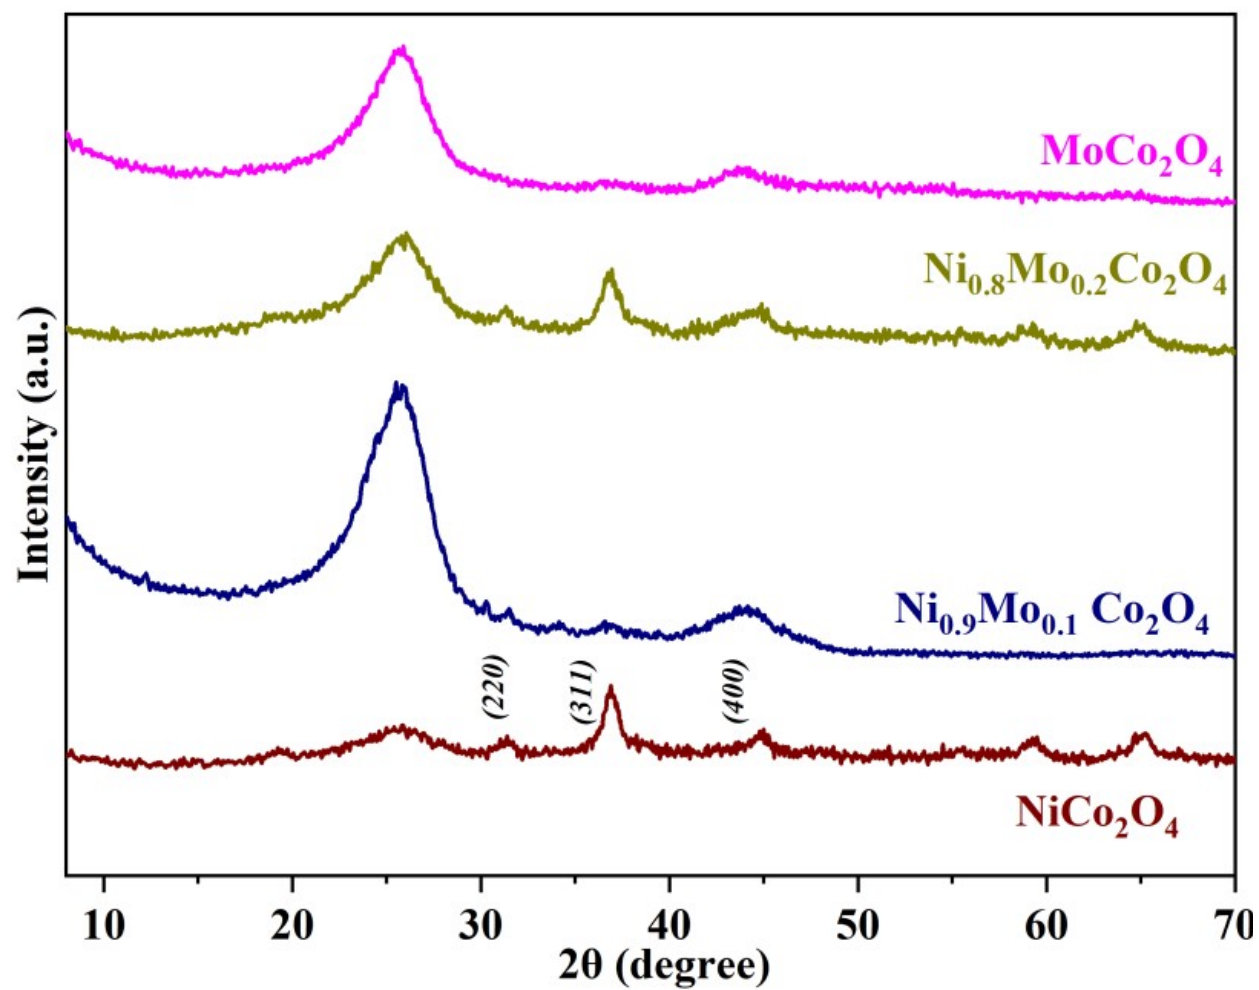

Figure S1. XRD pattern of the material growth of carbon cloth.

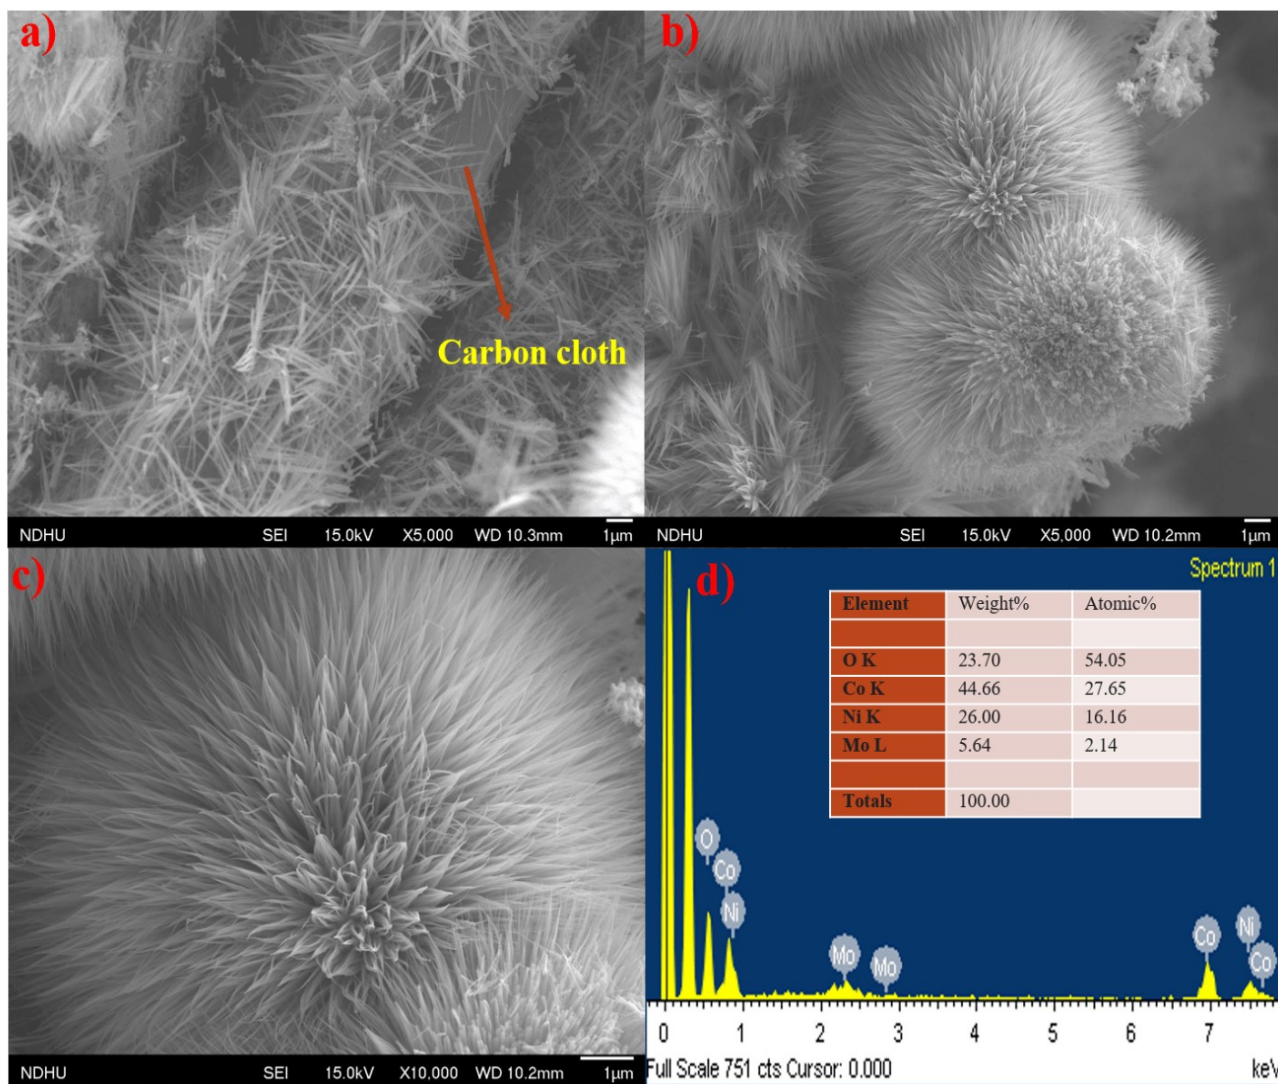

**Figure S2. a-c) FESEM Image of  $\text{NiCo}_2\text{O}_4$ , d) EDS for  $\text{Ni}_{0.9}\text{Mo}_{0.1}\text{Co}_2\text{O}_4$ .**

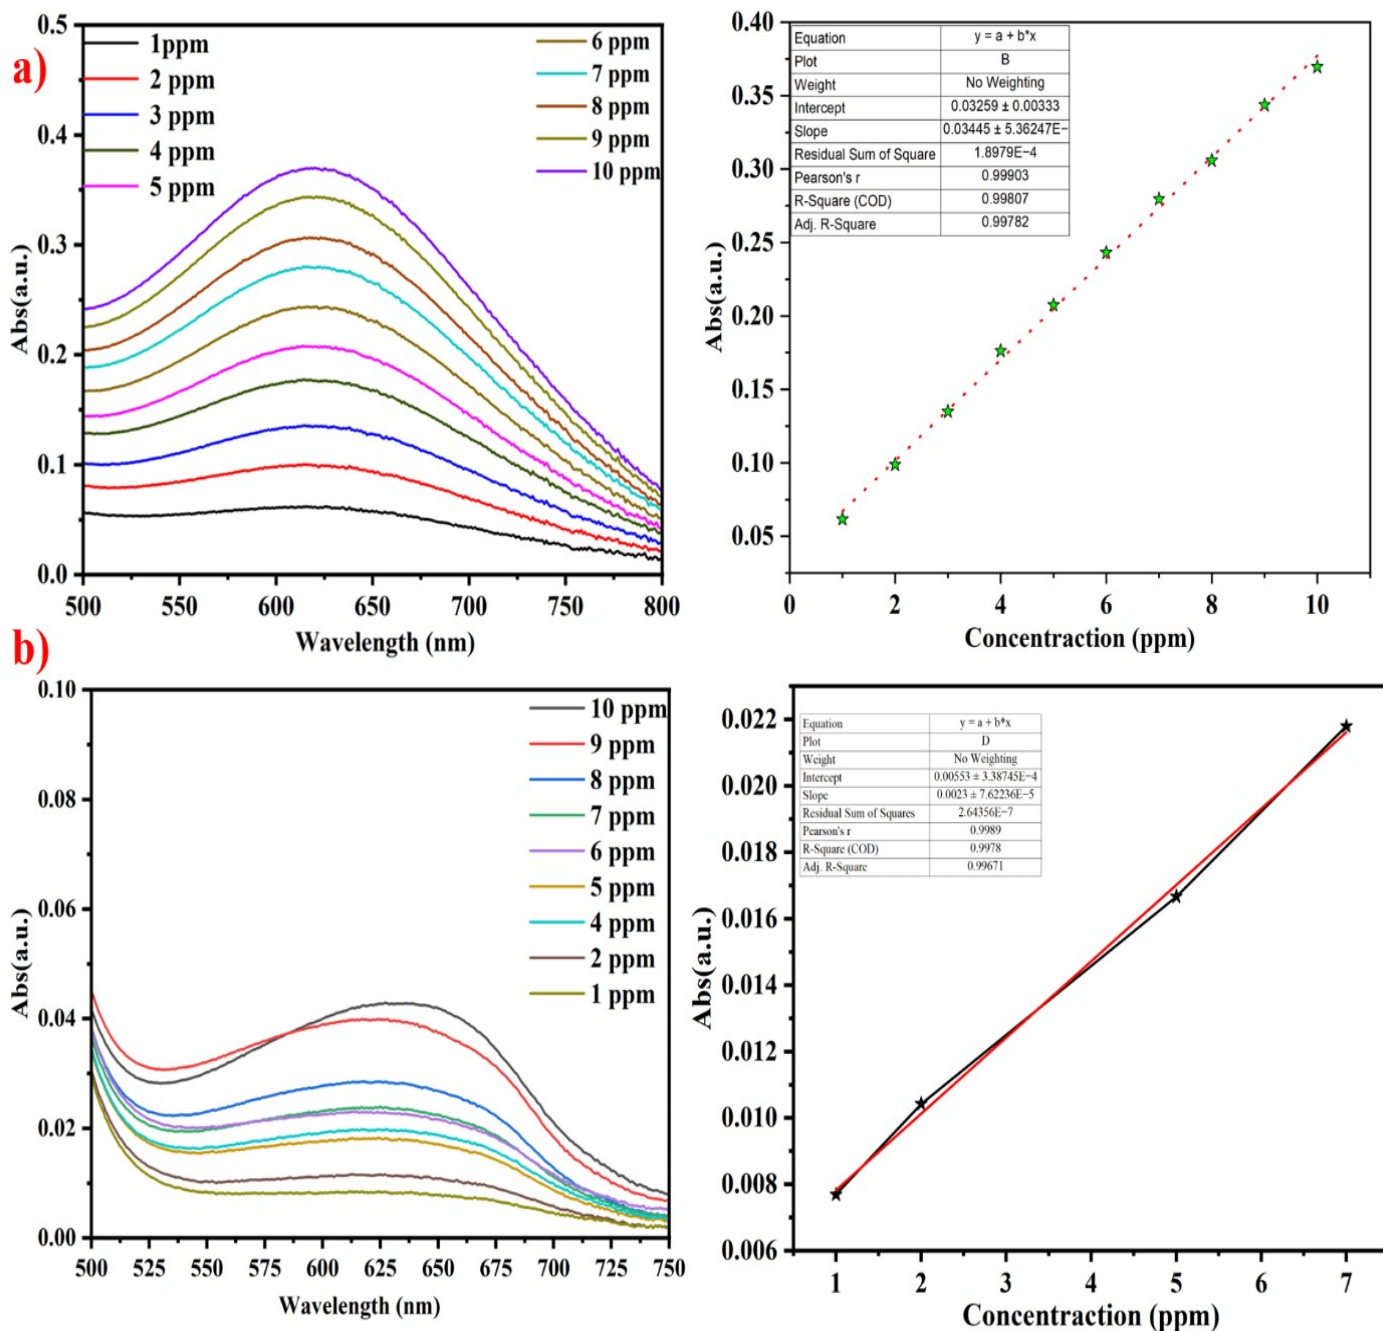

**Figure S3.** UV-Visible curves and concentration-absorbance calibration curves of  $\text{NH}_4\text{Cl}$ . **a)** UV-Visible absorption graph and calibration curve of  $\text{NH}_4\text{Cl} + \text{Na}_2\text{SO}_4$ , **b)** UV absorption graph and calibration curve of  $\text{NH}_4\text{Cl} + \text{KOH}$ .

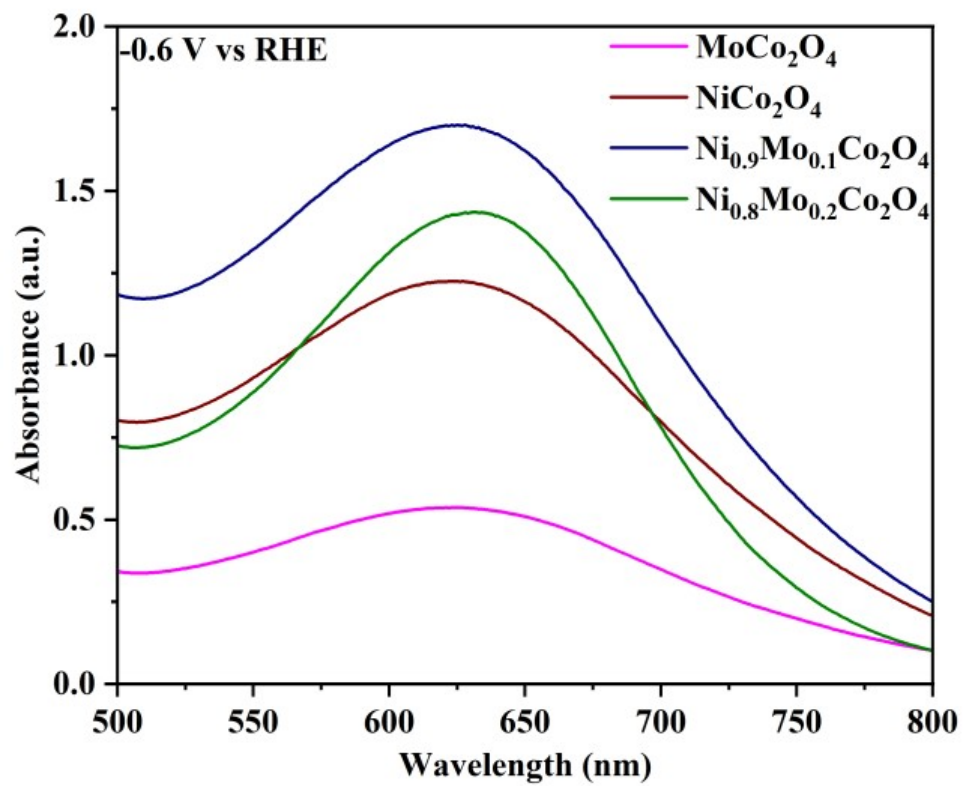

**Figure S4.** UV-Visible absorption graph of the electrocatalyst with the Indophenol method.

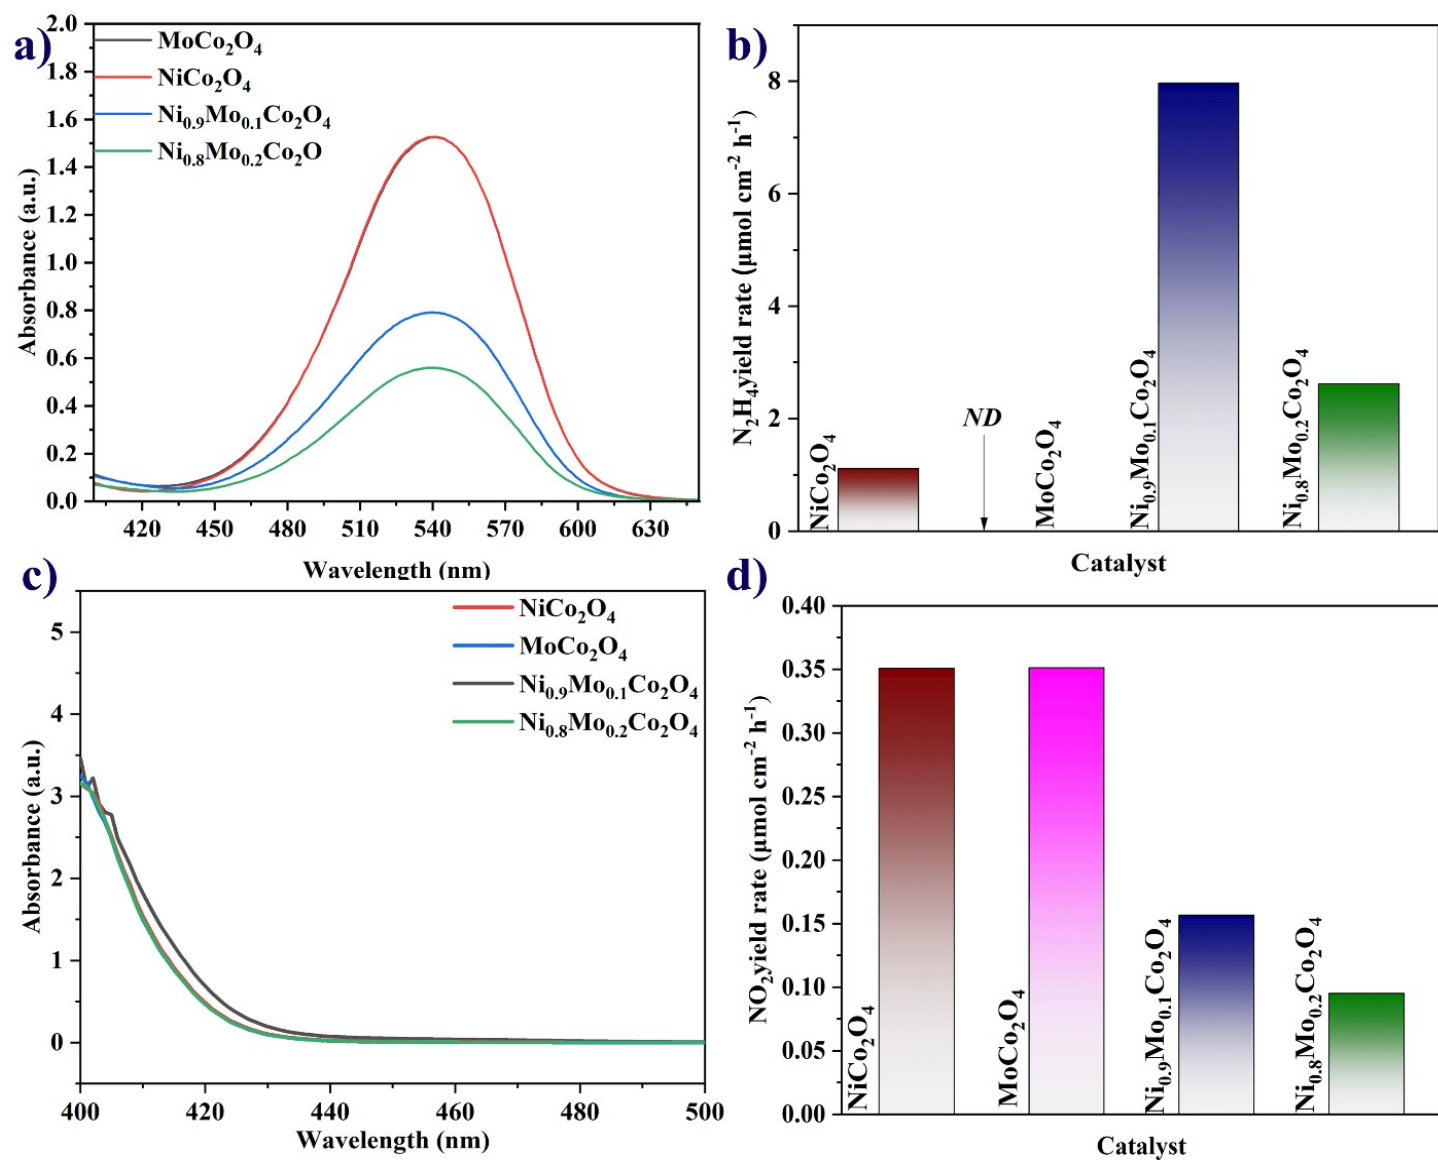

**Figure S5.** Intermediate formation during EnitRR: **a)** UV-Visible absorbance for  $\text{NO}_2$ , **b)** Yield rate of  $\text{NO}_2$ , **c)** UV-Visible absorbance for  $\text{N}_2\text{H}_4$ , **d)** Yield rate of  $\text{N}_2\text{H}_4$ .

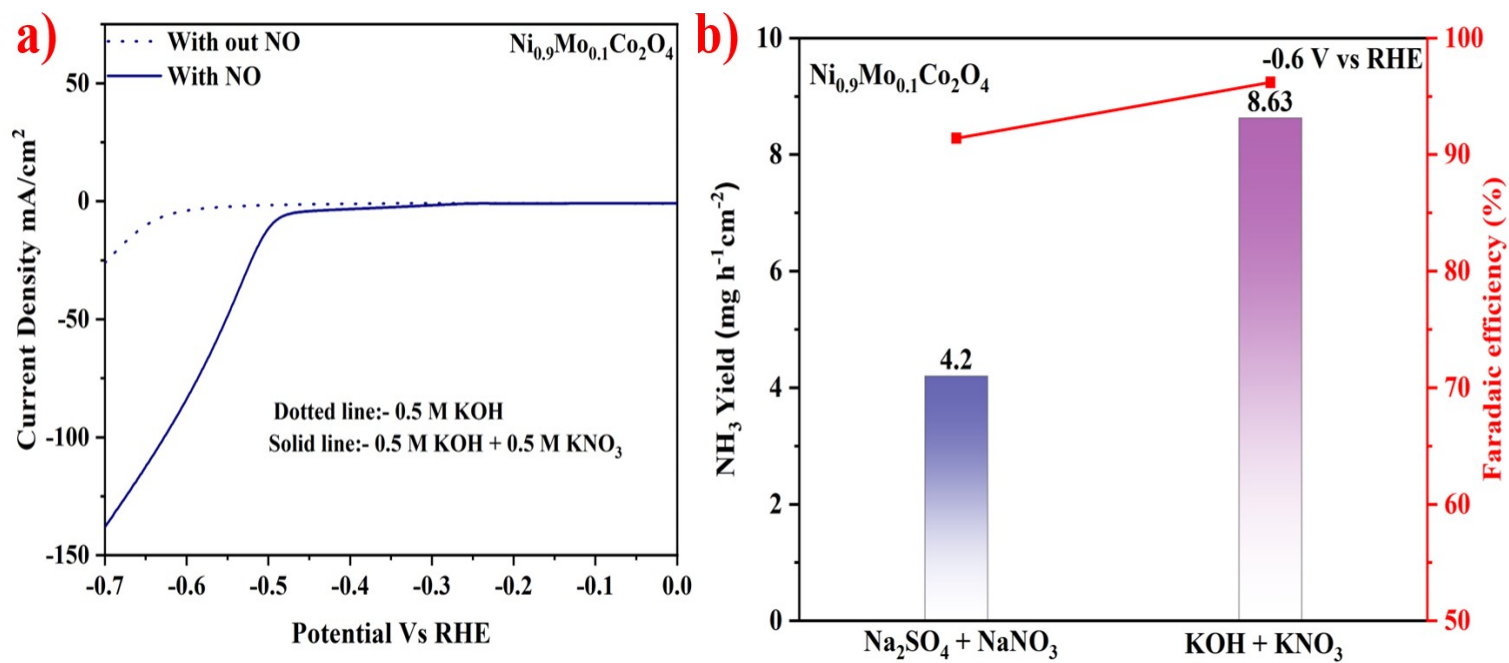

**Figure S6. a)** LSV curve of  $\text{Ni}_{0.9}\text{Mo}_{0.1}\text{Co}_2\text{O}_4$  under the alkaline environment, **b)**  $\text{NH}_3$  yield rate of  $\text{Ni}_{0.9}\text{Mo}_{0.1}\text{Co}_2\text{O}_4$  under the different environments.

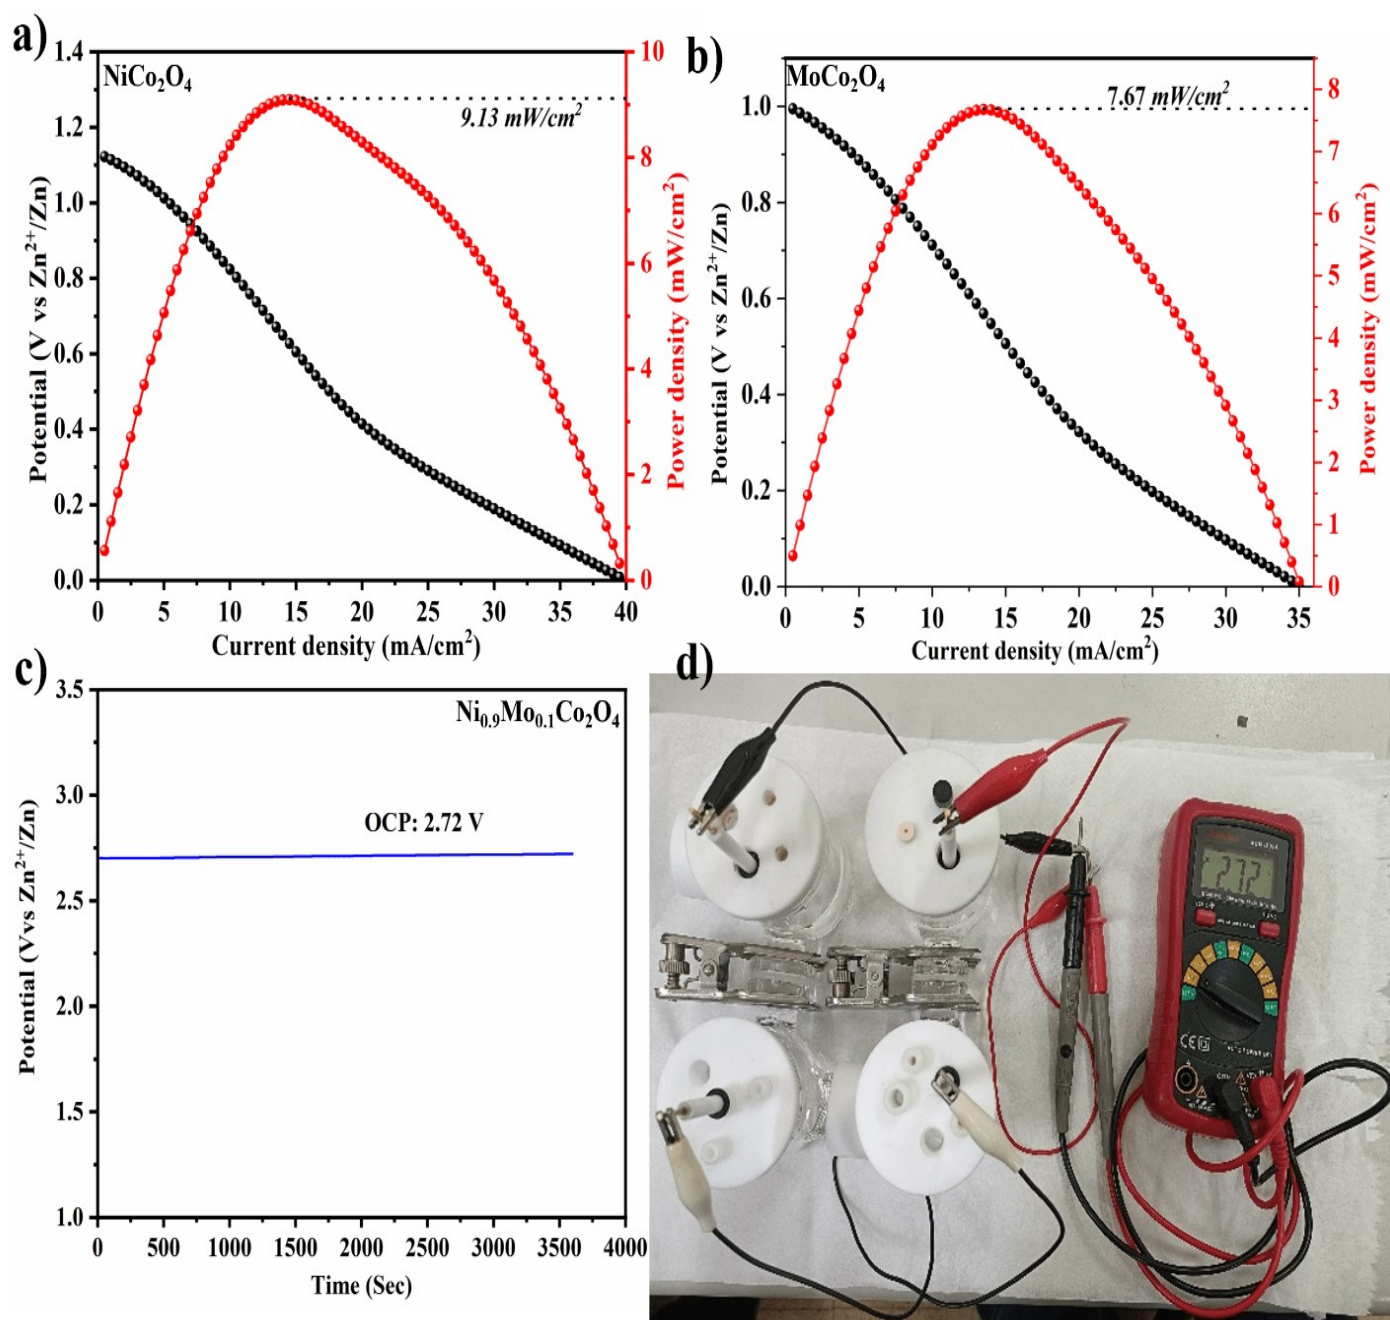

**Figure S7.** The polarization and power density curves: **a)**  $\text{NiCo}_2\text{O}_4$ , **b)**  $\text{MoCo}_2\text{O}_4$ , **c)**  $\text{Ni}_{0.9}\text{Mo}_{0.1}\text{Co}_2\text{O}_4$  open circuit potentials under the series connection, **d)** Digital picture of the series connection.

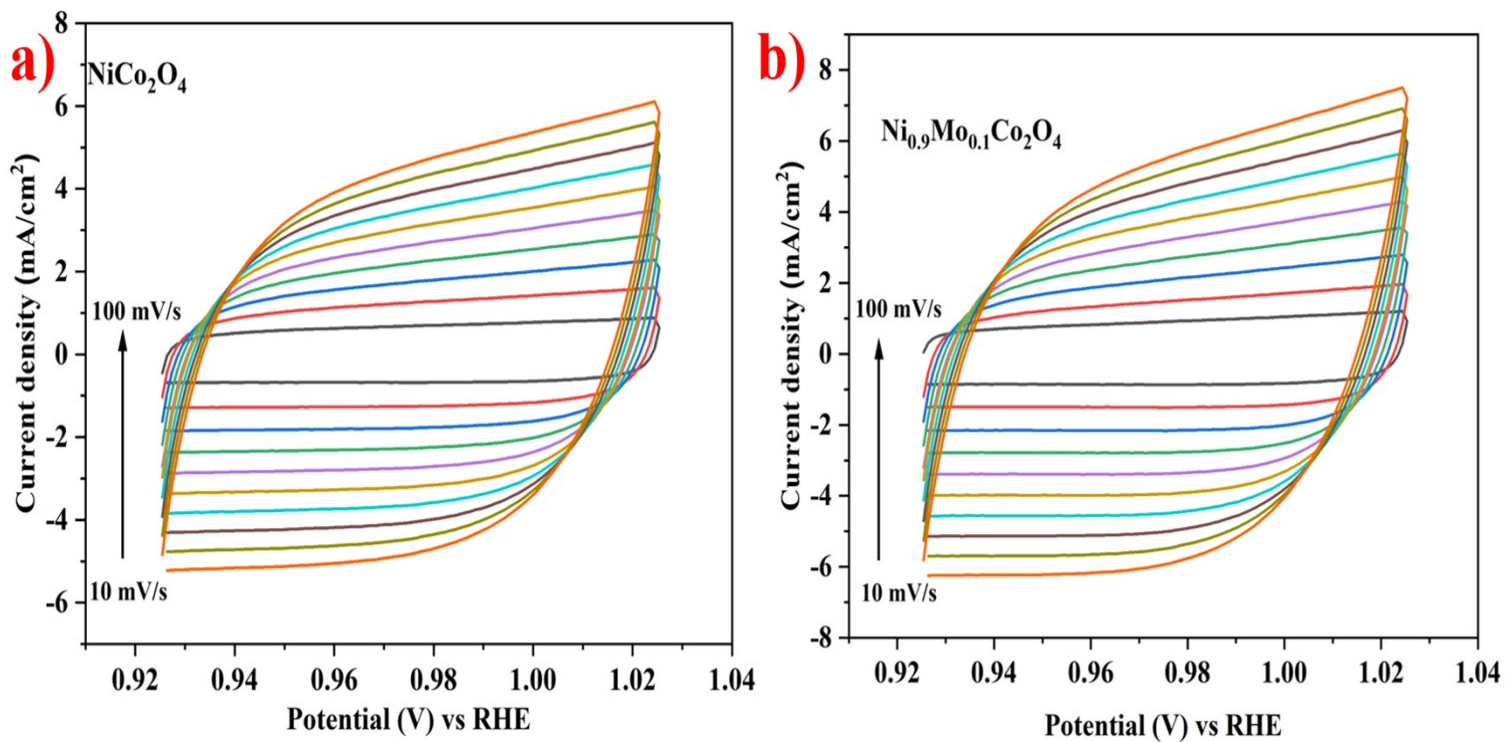

**Figure S8.** CV Curve during the OER: **a)**  $\text{NiCo}_2\text{O}_4$ , **b)**  $\text{Ni}_{0.9}\text{Mo}_{0.1}\text{Co}_2\text{O}_4$ .

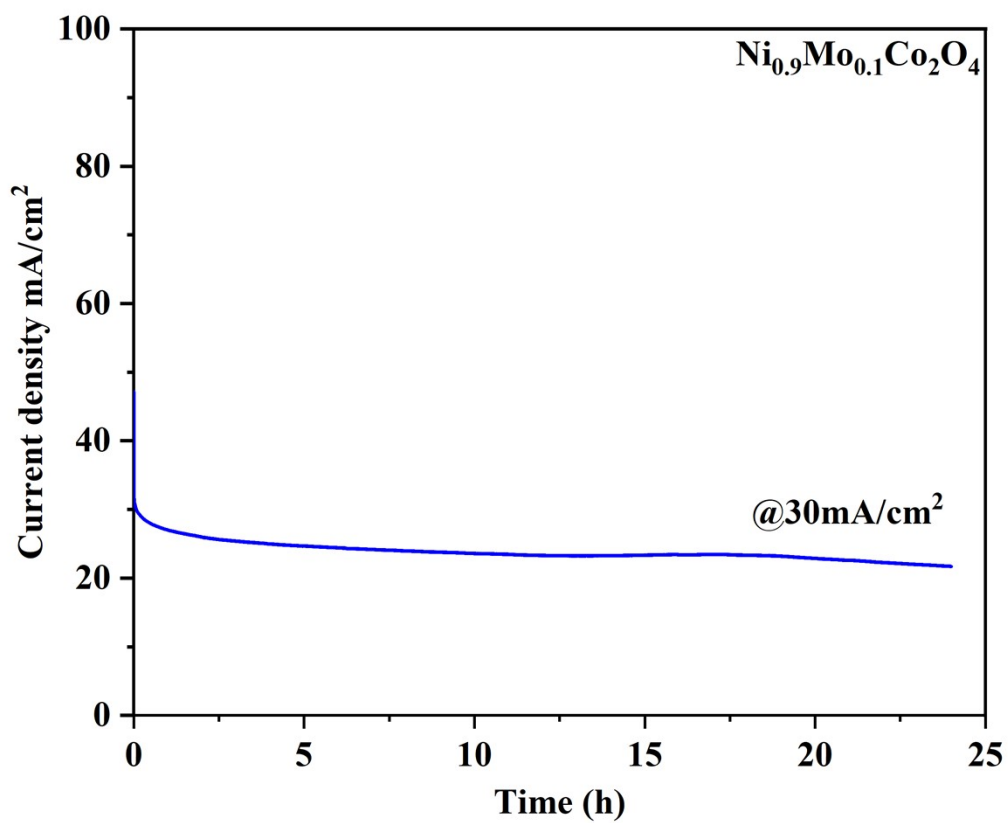

**Figure S9.** Stability test of  $\text{Ni}_{0.9}\text{Mo}_{0.1}\text{Co}_2\text{O}_4$  at a constant current density @ 30 mA/cm<sup>2</sup> over 24 h.

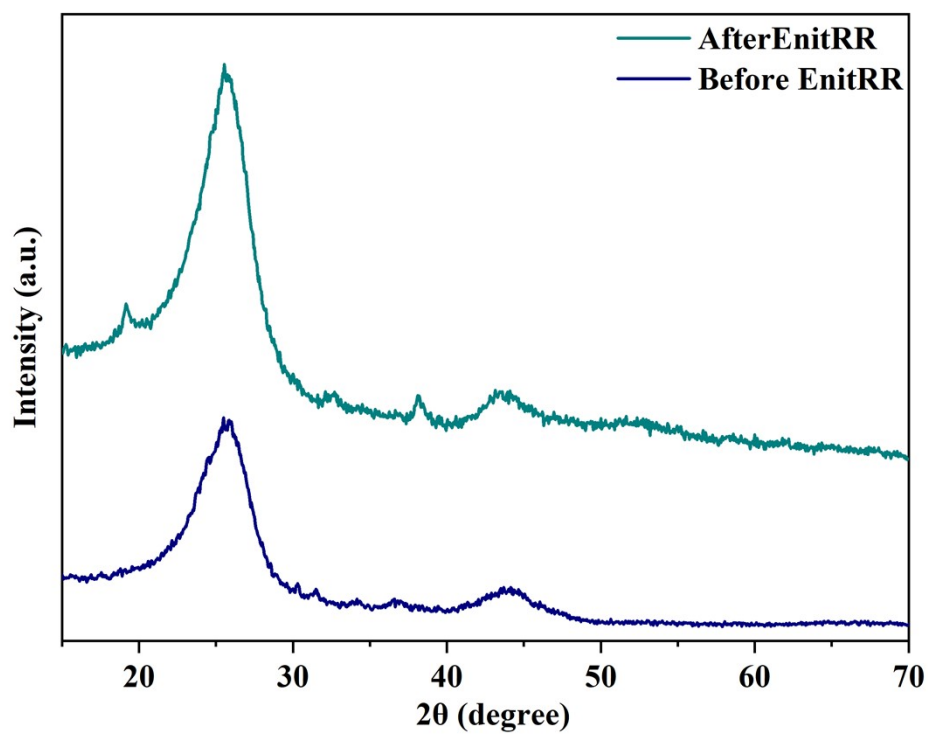

**Figure S10.** XRD pattern for  $\text{Ni}_{0.9}\text{Mo}_{0.1}\text{Co}_2\text{O}_4$  before and after EnitRR.

**Table S1. Comparison of recently reported top-performing electrocatalyst for NO<sub>3</sub><sup>-</sup> reduction to NH<sub>3</sub>**

| <b>Electrocatalyst</b>                                             | <b>NH<sub>3</sub> yield<br/>(mgh<sup>-1</sup>cm<sup>-2</sup>)</b> | <b>FE<br/>(%)</b> | <b>Potential<br/>(V vs RHE)</b> | <b>Electrolyte</b>                                                              | <b>Ref</b> |
|--------------------------------------------------------------------|-------------------------------------------------------------------|-------------------|---------------------------------|---------------------------------------------------------------------------------|------------|
| <b>Fe-MoS<sub>2</sub></b>                                          | 0.144 mgh <sup>-1</sup> cm <sup>-2</sup>                          | 80                | -0.53                           | 0.01 M PBS 500 ppm of NO <sub>3</sub> <sup>-</sup>                              | 1          |
| <b>V<sub>Zn</sub>-ZnCo<sub>2</sub>O<sub>4</sub></b>                | 4.21 mg h <sup>-1</sup> cm <sup>-2</sup>                          | 94                | -0.5                            | 1.0 M KOH + 0.1 M NO <sub>3</sub> <sup>-</sup>                                  | 2          |
| <b>ZnMn<sub>0.5</sub>Co<sub>1.5</sub>O<sub>4</sub></b>             | 3.87 mg h <sup>-1</sup> cm <sup>-2</sup>                          | 96                | -0.5                            | 1.0 M KOH + 0.1 M NO <sub>3</sub>                                               | 3          |
| <b>HEAOs are composed of Mn, Fe, Co, Ni, and Cu.</b>               | 5.35 mgh <sup>-1</sup> cm <sup>-2</sup>                           | 84                | -0.6                            | 1.0 M KOH + 0.1 M NO <sub>3</sub>                                               | 4          |
| <b>Co/CoO NSAs</b>                                                 | 3.3 mgh <sup>-1</sup> cm <sup>-2</sup>                            | 94                | -0.65                           | 0.1 M Na <sub>2</sub> SO <sub>4</sub> + 200 ppm NO <sub>3</sub> <sup>-</sup>    | 5          |
| <b>Fe<sub>1</sub>/Cu<sub>2</sub>-Co<sub>3</sub>O<sub>4</sub></b>   | 2.98 mgh <sup>-1</sup> cm <sup>-2</sup>                           | 98                | -0.78                           | 0.2 M Na <sub>2</sub> SO <sub>4</sub> + 100 ppm of NO <sub>3</sub> <sup>-</sup> | 6          |
| <b>Au-Cu NWs/CF</b>                                                | 0.1592 mgh <sup>-1</sup> cm <sup>-2</sup>                         | 84                | -1.05                           | 0.1 M Na <sub>2</sub> SO <sub>4</sub> + 10.0 mM KNO <sub>3</sub>                | 7          |
| <b>Ni<sub>0.9</sub>Mo<sub>0.1</sub>Co<sub>2</sub>O<sub>4</sub></b> | 4.20 mgh <sup>-1</sup> cm <sup>-2</sup>                           | 91                | -0.6                            | 0.5 M Na <sub>2</sub> SO <sub>4</sub> + 0.5 M NaNO <sub>3</sub> <sup>-</sup>    | This work  |
| <b>Ni<sub>0.9</sub>Mo<sub>0.1</sub>Co<sub>2</sub>O<sub>4</sub></b> | 8.63 mgh <sup>-1</sup> cm <sup>-2</sup>                           | 96                | -0.6                            | 0.5 M KOH + 0.5 M KNO <sub>3</sub>                                              | This work  |

**Table S2.** The full normalized activity for all prepared catalysts.

| Catalyst                                                             | Mass loading<br>(mg cm <sup>-2</sup> ) | Yield rate (mg<br>h <sup>-1</sup> cm <sup>-2</sup> ) | Yield mass<br>(mgh <sup>-1</sup> mg <sup>-1</sup> ) | C <sub>dl</sub><br>(mF cm <sup>-2</sup> ) | ECSA<br>(cm <sup>2</sup> ) | Yield ECSA<br>(mg h <sup>-1</sup> cm <sup>-2</sup> ) |
|----------------------------------------------------------------------|----------------------------------------|------------------------------------------------------|-----------------------------------------------------|-------------------------------------------|----------------------------|------------------------------------------------------|
| NiCo <sub>2</sub> O <sub>4</sub>                                     | 2.3                                    | 2.46                                                 | 1.07                                                | 3.17                                      | 79.3                       | 0.031                                                |
| MoCo <sub>2</sub> O <sub>4</sub>                                     | 2.5                                    | 1.20                                                 | 0.48                                                | -                                         | N/A                        | N/A                                                  |
| Ni <sub>0.95</sub> Mo <sub>0.05</sub> Co <sub>2</sub> O <sub>4</sub> | 2.1                                    | 3.11                                                 | 1.48                                                | -                                         | N/A                        | N/A                                                  |
| Ni <sub>0.9</sub> Mo <sub>0.1</sub> Co <sub>2</sub> O <sub>4</sub>   | 2.3                                    | 4.20                                                 | 1.83                                                | 4.67                                      | 116.8                      | 0.036                                                |
| Ni <sub>0.8</sub> Mo <sub>0.2</sub> Co <sub>2</sub> O <sub>4</sub>   | 2.6                                    | 3.50                                                 | 1.35                                                | -                                         | N/A                        | N/A                                                  |

**Table S3.** Comparison of Mo engineering and Ni/Co spinel OER catalysts.

| Catalyst                                                           | Tafel Slope<br>(mV/dec) | Overpotential<br>(mV)       | Electrolyte | Ref       |
|--------------------------------------------------------------------|-------------------------|-----------------------------|-------------|-----------|
| CuO/NiCo <sub>2</sub> O <sub>4</sub>                               | 94                      | 230 @10mA/cm <sup>2</sup>   | 1 M KOH     | 8         |
| V <sub>O</sub> -Mo <sub>x</sub> Co <sub>3-x</sub> O <sub>4</sub>   | 102.5                   | 490 @ 100mA/cm <sup>2</sup> | acidic      | 9         |
| NiCo <sub>2</sub> O <sub>4</sub> @CeO <sub>2</sub>                 | 108                     | 228 @ 10mA/cm <sup>2</sup>  | 1 M KOH     | 10        |
| Mo-Doped α-MnO <sub>2</sub>                                        | 86                      | 440 @ 10mA/cm <sup>2</sup>  | 1 M KOH     | 11        |
| Fe <sub>2</sub> O <sub>3</sub> @Mo                                 | 80                      | 359                         | 1 M KOH     | 12        |
| Ni <sub>0.9</sub> Mo <sub>0.1</sub> Co <sub>2</sub> O <sub>4</sub> | 99.74                   | 239                         | 1 M KOH     | This work |

**Table S4.** The detailed deconvolution parameters for the Ni 2p spectra, including peak positions and FWHM values, are summarized in Table S1.

| <b>Sample</b>                                                      | <b>Region</b>        | <b>Peak assignment</b> | <b>Binding energy (eV)</b> | <b>FWHM (eV)</b> | <b>Area (%)</b> |
|--------------------------------------------------------------------|----------------------|------------------------|----------------------------|------------------|-----------------|
| NiCo <sub>2</sub> O <sub>4</sub>                                   | Ni 2p <sub>3/2</sub> | Ni <sup>2+</sup>       | 854.46                     | 2.57             | <b>3817.87</b>  |
| NiCo <sub>2</sub> O <sub>4</sub>                                   | Ni 2p <sub>3/2</sub> | Ni <sup>3+</sup>       | 856.42                     | 2.70             | <b>6168.20</b>  |
| NiCo <sub>2</sub> O <sub>4</sub>                                   | Ni 2p <sub>3/2</sub> | Satellite              |                            |                  |                 |
| NiCo <sub>2</sub> O <sub>4</sub>                                   | Ni 2p <sub>1/2</sub> | Ni <sup>2+</sup>       | 872.13                     | 2.70             | <b>1465.17</b>  |
| NiCo <sub>2</sub> O <sub>4</sub>                                   | Ni 2p <sub>1/2</sub> | Ni <sup>3+</sup>       | 874.46                     | 1.91             | <b>6168.20</b>  |
| NiCo <sub>2</sub> O <sub>4</sub>                                   | Ni 2p <sub>1/2</sub> | Satellite              |                            |                  |                 |
| Ni <sub>0.9</sub> Mo <sub>0.1</sub> Co <sub>2</sub> O <sub>4</sub> | Ni 2p <sub>3/2</sub> | Ni <sup>2+</sup>       | 854.64                     | 2.09             | <b>5234.19</b>  |
| Ni <sub>0.9</sub> Mo <sub>0.1</sub> Co <sub>2</sub> O <sub>4</sub> | Ni 2p <sub>3/2</sub> | Ni <sup>3+</sup>       | 856.21                     | 2.87             | <b>2787.11</b>  |
| Ni <sub>0.9</sub> Mo <sub>0.1</sub> Co <sub>2</sub> O <sub>4</sub> | Ni 2p <sub>3/2</sub> | Satellite              |                            |                  |                 |
| Ni <sub>0.9</sub> Mo <sub>0.1</sub> Co <sub>2</sub> O <sub>4</sub> | Ni 2p <sub>1/2</sub> | Ni <sup>2+</sup>       | 872.71                     | 2.50             | <b>1338.66</b>  |
| Ni <sub>0.9</sub> Mo <sub>0.1</sub> Co <sub>2</sub> O <sub>4</sub> | Ni 2p <sub>1/2</sub> | Ni <sup>3+</sup>       | 874.96                     | 1.78             | <b>1924.70</b>  |
| Ni <sub>0.9</sub> Mo <sub>0.1</sub> Co <sub>2</sub> O <sub>4</sub> | Ni 2p <sub>1/2</sub> | Satellite              |                            |                  |                 |

**Table S5.** ICP-MS elemental composition of Ni<sub>0.9</sub>Mo<sub>0.1</sub>Co<sub>2</sub>O<sub>4</sub>.

| <b>Element</b> | <b>Atomic Weight (g/mol)</b> | <b>Measured Content (wt%)</b> | <b>Moles (mol)</b> | <b>Normalized Ratio</b> |
|----------------|------------------------------|-------------------------------|--------------------|-------------------------|
| <b>Ni</b>      | 58.69                        | 3.63                          | 0.0619             | 0.86                    |
| <b>Mo</b>      | 95.95                        | 0.35                          | 0.0036             | 0.05                    |
| <b>Co</b>      | 58.93                        | 8.46                          | 0.1436             | 2.00                    |

## Reference

- 1 N. Marino, R. G. Milazzo, R. Farina, C. Bongiorno, G. Fisicaro, S. Libertino, S. A. Lombardo and S. M. S. Privitera, *ACS Sustain. Chem. Eng.*, 2025, **13**, 18472–18485.
- 2 Q. Lai, Z. Liu, A. Akasa, X. Zhao, R. Wei, X.-W. Gao, T. M. Al Wafi, Q. Gu and W.-B. Luo, *Chemical Engineering Journal*, 2025, **520**, 166332.
- 3 Q.-S. Lai, X. Wang, X. Wang, Z. Liu, X. Zhao, X.-W. Gao, Q. Gu and W.-B. Luo, *Chemical Engineering Journal*, 2026, **531**, 174275.
- 4 G. Raj, S. Midya, R. Nandan, O. Y. Bisen, A. chakraborty, M. Kumari, A. K. Yadav, A. K. Singh and K. K. Nanda, *Small*, DOI:10.1002/sml.202507803.
- 5 Y. Yu, C. Wang, Y. Yu, Y. Wang and B. Zhang, *Sci. China Chem.*, 2020, **63**, 1469–1476.
- 6 M. Song, Y. Xing, Y. Li, D. Liu, E. Han, Y. Gao, Z. Yang, X. Yang and Y. He, *Inorg. Chem.*, 2023, **62**, 16641–16651.
- 7 Y. Zha, M. Liu, J. Wang, J. Feng, D. Li, D. Zhao, S. Zhang and T. Shi, *RSC Adv.*, 2023, **13**, 9839–9844.
- 8 A. Q. Mugheri, A. Tahira, U. Aftab, A. L. Bhatti, N. N. Memon, J.-R. Memon, M. I. Abro, A. A. Shah, M. Willander, A. A. Hullio and Z. H. Ibupoto, *RSC Adv.*, 2019, **9**, 42387–42394.
- 9 L. Sun, M. Feng, Y. Peng, X. Zhao, Y. Shao, X. Yue and S. Huang, *J. Mater. Chem. A Mater.*, 2024, **12**, 8796–8804.
- 10 S. Xu, P. Zhang, R. Zhao, J. Wook Bae, H. Li, J. Yong Lee and P. J. Yoo, *Chemical Engineering Journal*, 2024, **482**, 148787.
- 11 Y. Chen, S. Yang, T. Wang, S. Li, X. Liu, W. Zhang and R. Cao, *ChemSusChem*, DOI:10.1002/cssc.202401553.
- 12 A. Maurya and M. Yadav, *J. Alloys Compd.*, 2023, **956**, 170208.
